# Supplementary material for: Analysis of Heat Exposure During Pregnancy and Severe Maternal Morbidity
Source: PubMed Central journal article supplement (PMC10485728; doi:10.1001/jamanetworkopen.2023.32780), 2023-09-07
Supplement: jamanetwopen-e2332780-s002.pdf [file jamanetwopen-e2332780-s002.pdf]

## Data Sharing Statement

Jiao. Analysis of Heat Exposure During Pregnancy and Severe Maternal Morbidity. *JAMA Netw Open*. Published September 07, 2023. doi:10.1001/jamanetworkopen.2023.32780

### Data

**Data available:** No

### Additional Information

**Explanation for why data not available:** We use individual-level electronic health record data from a healthcare system; these data are confidential and protected by specific Institutional Review Board protocols.
